# Supplementary material for: Stearic Acid as an Atomic Layer Deposition Inhibitor: Spectroscopic Insights from AFM-IR
Source: MDPI journal article supplement (doi:10.3390/nano13192713), 2023-10-06
Supplement: s1 [file s1]

## Supporting Information:

# Stearic Acid as an Atomic Layer Deposition Inhibitor: Spectroscopic Insights from AFM-IR

Saumya Satyarthi <sup>1,†</sup>, Md Hasan Ul Iqbal <sup>1,†</sup>, Fairoz Abida <sup>2</sup>, Ridwan Nahar <sup>3</sup>, Adam J. Hauser <sup>3</sup>,  
Mark Ming-Cheng Cheng <sup>2</sup> and Ayanjeet Ghosh <sup>1,\*</sup>

<sup>1</sup> Department of Chemistry and Biochemistry, The University of Alabama, Tuscaloosa, AL 35487, USA;  
ssatyarthi@crimson.ua.edu (S.S.); mhasanuliqbal@crimson.ua.edu (M.H.U.I.)

<sup>2</sup> Department of Electrical and Computer Engineering, The University of Alabama,  
Tuscaloosa, AL 35487, USA; fabida@crimson.ua.edu (F.A.); mmcheng@eng.ua.edu (M.M.-C.C.)

<sup>3</sup> Department of Physics and Astronomy, The University of Alabama, Tuscaloosa, AL 35487, USA;  
rnahar1@crimson.ua.edu (R.N.); ahauser@ua.edu (A.J. H.)

\* Correspondence: ayanjeet.ghosh@ua.edu

† The authors contributed equally to this work.

Plain Copper substrate  
after washing with ethanol

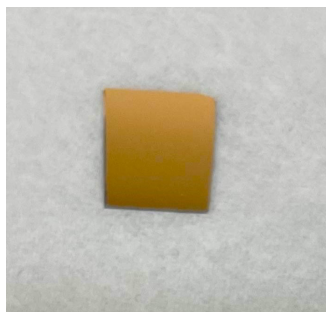

Copper substrate after  
exposing it to 100°C

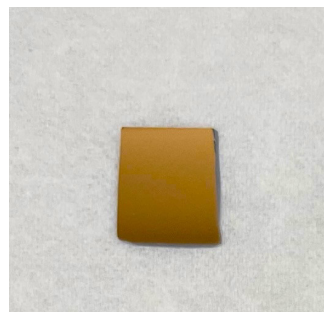

**Figure S1.** Optical images of bare Cu substrates before (left) and after (right) heating at 100 °C, indicating no visual signs of degradation.

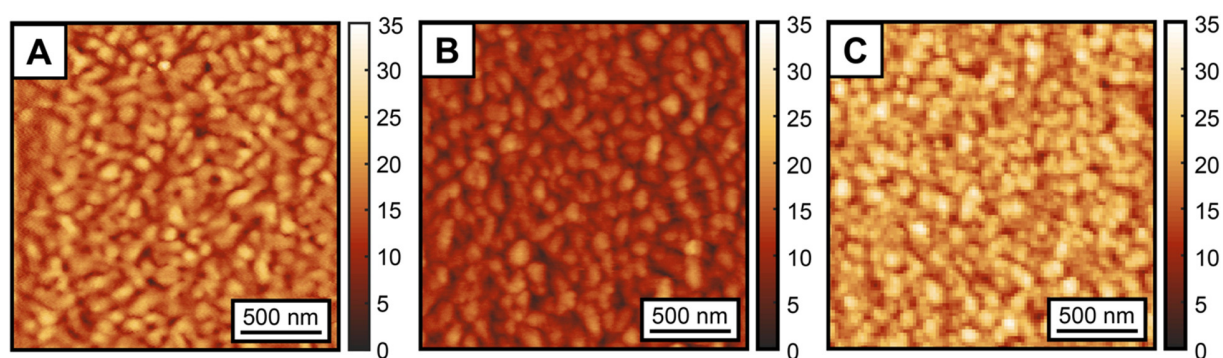

**Figure S2.** AFM topographs of SA SAMs on Cu after A) 25 cycles, B) 50 cycles and C) 200 cycles of ALD.

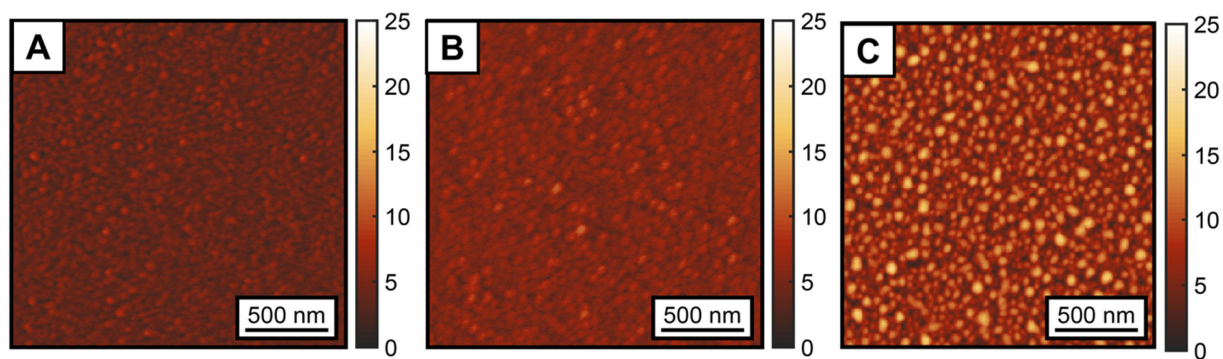

**Figure S3.** AFM topographs of SA SAMs on Co after A) 25 cycles, B) 50 cycles and C) 200 cycles of ALD.

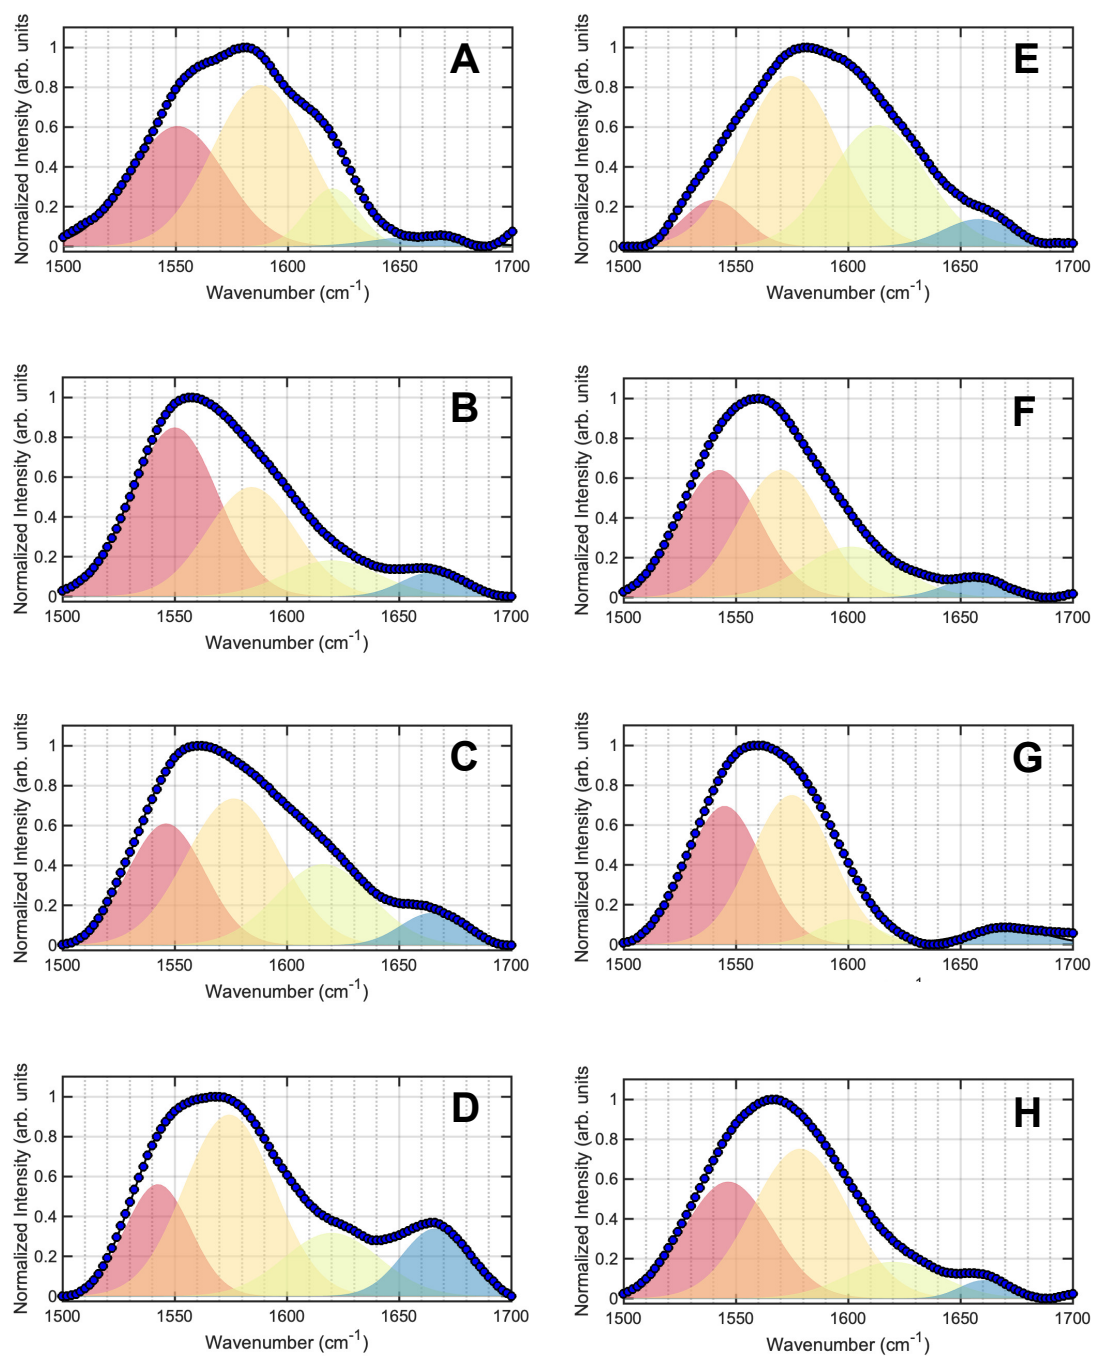

**Figure S4.** Curve fitting of AFM-IR spectra of SA SAMs corresponding to A) 0 cycles ALD on Cu, B) 25 cycles ALD on Cu, C) 50 cycles ALD on Cu, D) 200 cycles ALD on Cu, E) 0 cycles ALD on Co, F) 25 cycles ALD on Co, G) 50 cycles ALD on Co and H) 200 cycles ALD on Co.
